# Supplementary material for: Interplay Between Duration of Androgen Deprivation Therapy and External Beam Radiotherapy With or Without a Brachytherapy Boost for Optimal Treatment of High-risk Prostate Cancer: A Patient-Level Data Analysis of 3 Cohorts
Source: PubMed Central journal article supplement (PMC8778608; doi:10.1001/jamaoncol.2021.6871), 2022-01-20
Supplement: jamaoncol-e216871-s001.pdf [file jamaoncol-e216871-s001.pdf]

## Supplemental Online Content

Kishan AU, Steigler A, Denham JW, et al. Interplay between duration of androgen deprivation therapy and external beam radiotherapy with or without a brachytherapy boost for optimal treatment of high-risk prostate cancer: a patient-level data analysis of 3 cohorts. *JAMA Oncol*. Published online January 20, 2022. doi:10.1001/jamaoncol.2021.6871

**eFigure 1.** Histograms Depicting Distribution of Use of Various Durations of Androgen Deprivation Therapy in the Multi-Institutional Cohort

**eFigure 2.** Associations Between Survival Outcomes and Use of  $\geq 18$  months of Androgen Deprivation Therapy versus  $< 6$  months of Androgen Deprivation Therapy in the Multi-Institutional Cohort

**eTable 1.** Adjusted Cox Models for Distant Metastasis-Free Survival and Overall Survival

**eTable 2.** Adjusted Cox Models for Distant Metastasis-Free Survival and Overall Survival Using Alternative Binning Definitions Around 6 and 18 months

**eFigure 3.** Distribution of Propensity Scores in the Multi-Institutional Cohort, Stratified by Treatment Type and ADT duration

**eTable 3.** Adjusted Cox Models for Distant Metastasis-Free Survival and Overall Survival Using A Dichotomization at 12 Months

**eFigure 4.** Associations Between Survival Outcomes and Use of 18 months of Androgen Deprivation Therapy versus 6 months of Androgen Deprivation Therapy in the RADAR Trial with Comparison to Multi-Institutional Cohort

**eFigure 5.** Distant Metastasis-Free Survival and Overall Survival Outcomes for Men Receiving 4-6 or 16-20 months of Androgen Deprivation Therapy in the Multi-Institutional Cohort

**eFigure 6.** Associations Between Survival Outcomes and Use of 28 months of Androgen Deprivation Therapy in the GICOR Trial versus 6 months or 18 months of Androgen Deprivation Therapy in the RADAR Trial

This supplemental material has been provided by the authors to give readers additional information about their work.

**eFigure 1. Histograms Depicting Distribution of Use of Various Durations of Androgen Deprivation Therapy in the Multi-Institutional Cohort**

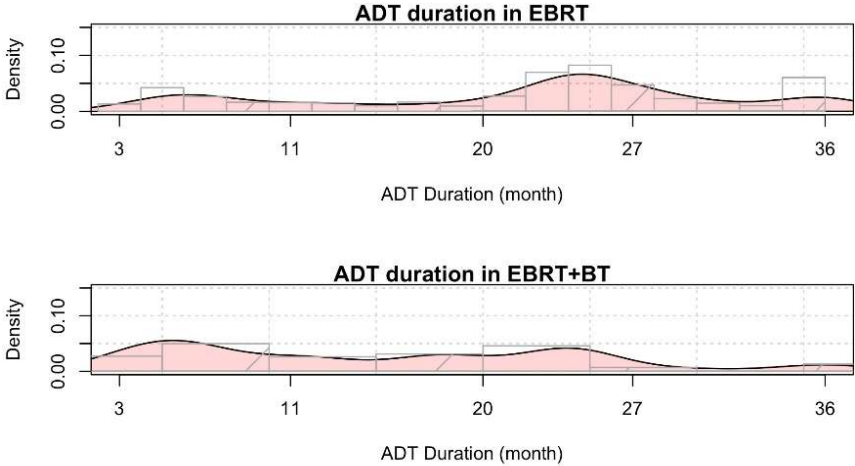

Top row shows density histogram for ADT duration in patients receiving external beam radiotherapy (EBRT), bottom row shows density histogram for ADT duration in patients receiving EBRT+brachytherapy boost (EBRT+BT). ADT, androgen deprivation therapy; EBRT, external beam radiotherapy; EBRT+BT, external beam radiotherapy plus brachytherapy boost.

**eFigure 2. Associations Between Survival Outcomes and Use of  $\geq 18$  months of Androgen Deprivation Therapy versus  $< 6$  months of Androgen Deprivation Therapy in the Multi-Institutional Cohort**

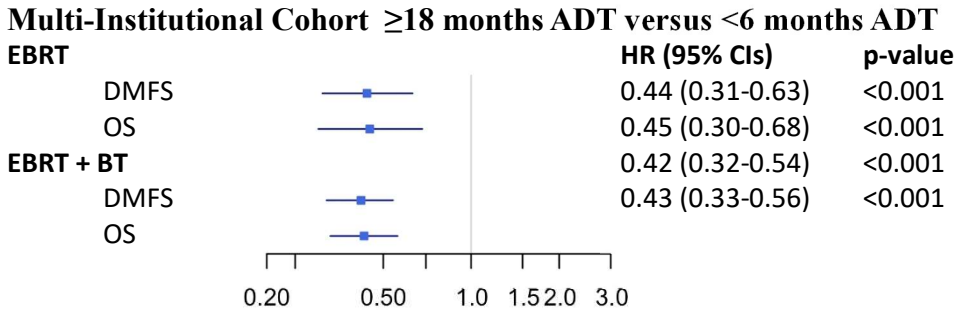

Forest plots showing associations between distant metastasis-free survival (DMFS) and overall survival (OS) and androgen deprivation therapy (ADT) duration in men receiving external beam radiotherapy (EBRT) or EBRT+brachytherapy boost (EBRT+BT). 95% CI; 95% confidence interval; ADT, androgen deprivation therapy; DMFS, distant metastasis-free survival; EBRT, external beam radiotherapy; EBRT+BT, EBRT+brachytherapy boost; HR, hazard ratio.

**eTable 1. Adjusted Cox Models for Distant Metastasis-Free Survival and Overall Survival**

| ADT Duration (months) | Distant Metastasis-Free Survival |         | Overall Survival   |         |
|-----------------------|----------------------------------|---------|--------------------|---------|
|                       | HR (95%CI)                       | p-value | HR (95%CI)         | p-value |
| <b>EBRT</b>           |                                  |         |                    |         |
| (≥6 and <18) vs. <6   | 0.9 (0.61 - 1.31)                | 0.581   | 0.9 (0.58 - 1.38)  | 0.615   |
| ≥18 vs. <6            | 0.44 (0.31 - 0.63)               | <0.001  | 0.45 (0.3 - 0.68)  | <0.001  |
| ≥18 vs. (≥6 and <18)  | 0.49 (0.39 - 0.62)               | < 0.001 | 0.5 (0.39 - 0.65)  | < 0.001 |
| <b>EBRT+BT</b>        |                                  |         |                    |         |
| (≥6 and <18) vs. <6   | 0.34 (0.25 - 0.45)               | <0.001  | 0.3 (0.22 - 0.41)  | <0.001  |
| ≥18 vs. <6            | 0.42 (0.32 - 0.54)               | <0.001  | 0.43 (0.33 - 0.56) | <0.001  |
| ≥18 vs. (≥6 and <18)  | 1.23 (0.91 - 1.66)               | 0.171   | 1.44 (1.04 - 1.99) | 0.026   |

ADT, androgen deprivation therapy; CI, confidence interval; EBRT, external beam radiotherapy; EBRT+BT, EBRT+brachytherapy boost; HR, hazard ratio

**eTable 2. Adjusted Cox Models for Distant Metastasis-Free Survival and Overall Survival Using Alternative Binning Definitions**

| ADT Duration (months)                                                                                                          | Distant Metastasis-Free Survival |           | Overall Survival   |           |
|--------------------------------------------------------------------------------------------------------------------------------|----------------------------------|-----------|--------------------|-----------|
|                                                                                                                                | HR (95%CI)                       | p-value   | HR (95%CI)         | p-value   |
| <b>Alternative Definition 1: <math>\leq 6</math> vs. <math>&gt; 6</math> and <math>&lt; 18</math> vs. <math>\geq 18</math></b> |                                  |           |                    |           |
| <b>EBRT</b>                                                                                                                    |                                  |           |                    |           |
| $(> 6$ and $< 18)$ vs. $\leq 6$                                                                                                | 1.23 (0.88 - 1.71)               | 0.224     | 1.32 (0.91 - 1.92) | 0.144     |
| $\geq 18$ vs. $\leq 6$                                                                                                         | 0.54 (0.4 - 0.72)                | $< 0.001$ | 0.58 (0.41 - 0.82) | 0.002     |
| $\geq 18$ vs. $(> 6$ and $< 18)$                                                                                               | 0.44 (0.34 - 0.56)               | $< 0.001$ | 0.44 (0.33 - 0.58) | $< 0.001$ |
| <b>EBRT+BT</b>                                                                                                                 |                                  |           |                    |           |
| $(> 6$ and $< 18)$ vs. $\leq 6$                                                                                                | 0.43 (0.31 - 0.59)               | $< 0.001$ | 0.4 (0.28 - 0.57)  | $< 0.001$ |
| $\geq 18$ vs. $\leq 6$                                                                                                         | 0.53 (0.42 - 0.69)               | $< 0.001$ | 0.56 (0.43 - 0.73) | $< 0.001$ |
| $\geq 18$ vs. $(> 6$ and $< 18)$                                                                                               | 1.25 (0.89 - 1.75)               | 0.199     | 1.41 (0.98 - 2.03) | 0.065     |
| <b>Alternative Definition 2: <math>\leq 6</math> vs. <math>&gt; 6</math> and <math>\leq 18</math> vs. <math>&gt; 18</math></b> |                                  |           |                    |           |
| <b>EBRT</b>                                                                                                                    |                                  |           |                    |           |
| $(> 6$ and $\leq 18)$ vs. $\leq 6$                                                                                             | 1.21 (0.87 - 1.67)               | 0.259     | 1.3 (0.9 - 1.89)   | 0.162     |
| $> 18$ vs. $\leq 6$                                                                                                            | 0.53 (0.4 - 0.72)                | $< 0.001$ | 0.58 (0.41 - 0.81) | 0.001     |
| $> 18$ vs. $(> 6$ and $\leq 18)$                                                                                               | 0.44 (0.35 - 0.57)               | $< 0.001$ | 0.44 (0.34 - 0.58) | $< 0.001$ |
| <b>EBRT+BT</b>                                                                                                                 |                                  |           |                    |           |
| $(> 6$ and $\leq 18)$ vs. $\leq 6$                                                                                             | 0.4 (0.3 - 0.53)                 | $< 0.001$ | 0.4 (0.28 - 0.57)  | $< 0.001$ |
| $> 18$ vs. $\leq 6$                                                                                                            | 0.6 (0.46 - 0.78)                | $< 0.001$ | 0.62 (0.47 - 0.81) | $< 0.001$ |
| $> 18$ vs. $(> 6$ and $\leq 18)$                                                                                               | 1.5 (1.1 - 2.05)                 | 0.011     | 1.58 (1.13 - 2.19) | 0.007     |
| <b>Alternative Definition 3: <math>&lt; 6</math> vs. <math>\geq 6</math> and <math>\leq 18</math> vs. <math>&gt; 18</math></b> |                                  |           |                    |           |
| <b>EBRT</b>                                                                                                                    |                                  |           |                    |           |
| $(\geq 6$ and $\leq 18)$ vs. $< 6$                                                                                             | 0.89 (0.61 - 1.3)                | 0.557     | 0.89 (0.58 - 1.37) | 0.599     |
| $> 18$ vs. $< 6$                                                                                                               | 0.44 (0.3 - 0.63)                | $< 0.001$ | 0.45 (0.3 - 0.67)  | $< 0.001$ |
| $> 18$ vs. $(\geq 6$ and $\leq 18)$                                                                                            | 0.49 (0.39 - 0.61)               | $< 0.001$ | 0.5 (0.39 - 0.65)  | $< 0.001$ |
| <b>EBRT+BT</b>                                                                                                                 |                                  |           |                    |           |
| $(\geq 6$ and $\leq 18)$ vs. $< 6$                                                                                             | 0.32 (0.25 - 0.42)               | $< 0.001$ | 0.29 (0.22 - 0.39) | $< 0.001$ |
| $> 18$ vs. $< 6$                                                                                                               | 0.47 (0.36 - 0.62)               | $< 0.001$ | 0.47 (0.36 - 0.62) | $< 0.001$ |
| $> 18$ vs. $(\geq 6$ and $\leq 18)$                                                                                            | 1.46 (1.09 - 1.96)               | 0.01      | 1.61 (1.18 - 2.18) | 0.003     |

ADT, androgen deprivation therapy; CI, confidence interval; EBRT, external beam radiotherapy; EBRT+BT, EBRT+brachytherapy boost; HR, hazard ratio

**eFigure 3. Distribution of Propensity Scores in the Multi-Institutional Cohort, Stratified by Treatment Type and ADT duration**

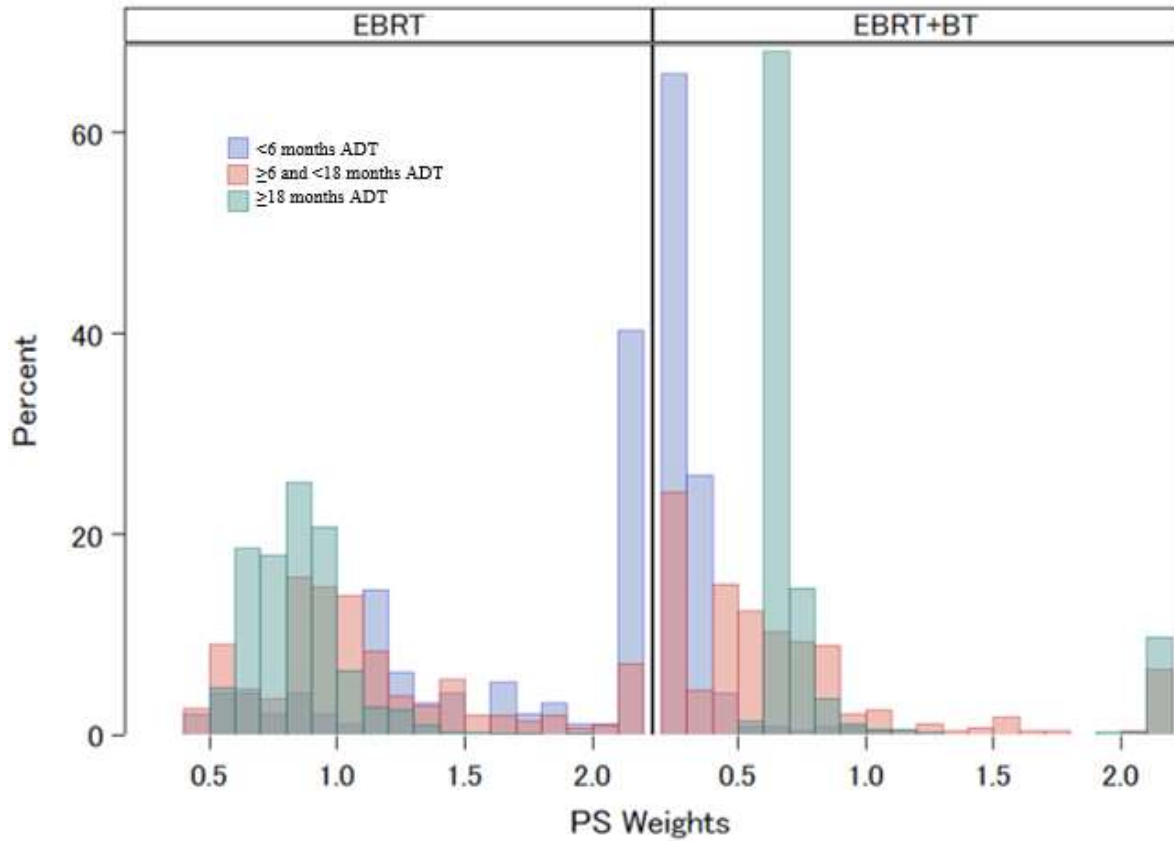

**eFigure 3. Distribution of Propensity Scores in the Multi-Institutional Cohort, Stratified by Treatment Type and ADT duration.** ADT, androgen deprivation therapy; EBRT, external beam radiotherapy; EBRT+BT, EBRT+brachytherapy boost; PS, propensity score

**eTable 3.** Adjusted Cox Models for Distant Metastasis-Free Survival and Overall Survival Using A Dichotomization at 12 Months

| ADT Duration (months) | Distant Metastasis-Free Survival |         | Overall Survival |                    |
|-----------------------|----------------------------------|---------|------------------|--------------------|
|                       | HR (95%CI)                       | p-value |                  | HR (95%CI)         |
| <b>EBRT</b>           |                                  |         |                  |                    |
| ≥12 vs. <12           | 0.53 (0.42 - 0.66)               | <0.001  | ≥12 vs. <12      | 0.53 (0.42 - 0.66) |
| <b>EBRT+BT</b>        |                                  |         |                  |                    |
| ≥12 vs. <12           | 0.47 (0.36 - 0.6)                | <0.001  | ≥12 vs. <12      | 0.47 (0.36 - 0.6)  |

ADT, androgen deprivation therapy; CI, confidence interval; EBRT, external beam radiotherapy; EBRT+BT, EBRT+brachytherapy boost; HR, hazard ratio

**eFigure 4. Associations Between Survival Outcomes and Use of 18 months of Androgen Deprivation Therapy versus 6 months of Androgen Deprivation Therapy in the RADAR Trial with Comparison to Multi-Institutional Cohort**

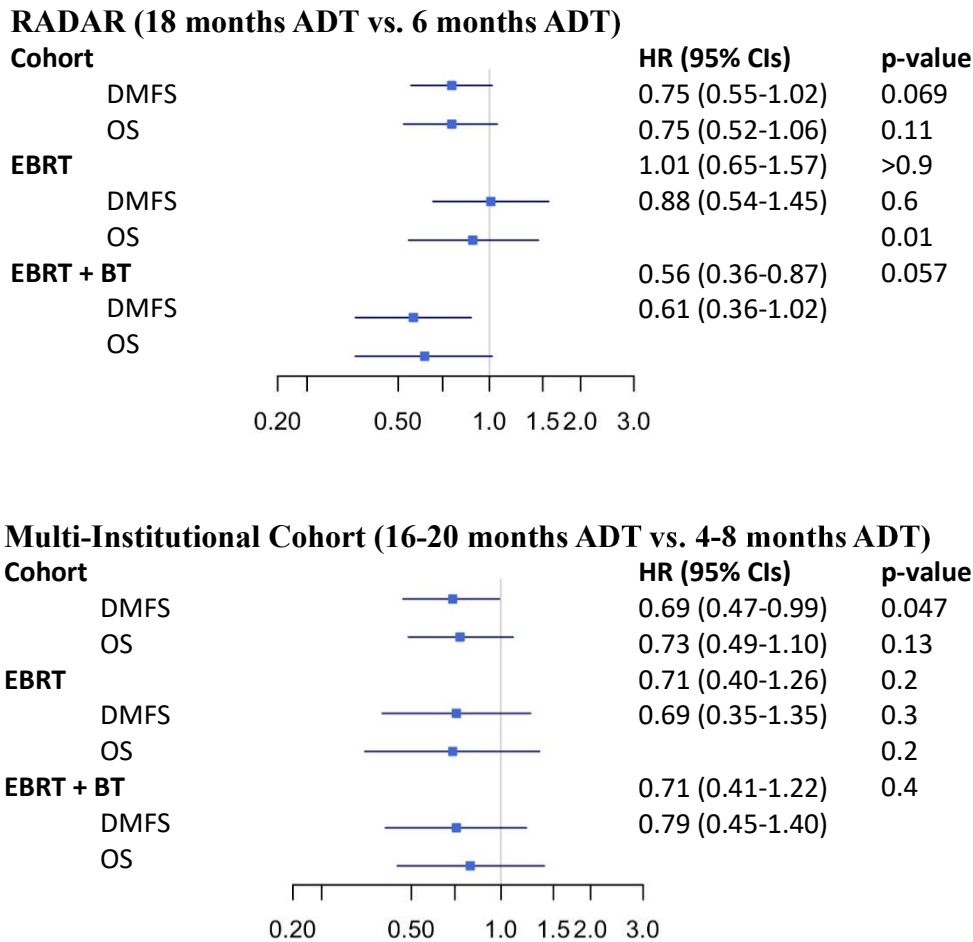

**eFigure 4. Associations Between Survival Outcomes and Use of 18 months of Androgen Deprivation Therapy (ADT) versus 6 months of Androgen Deprivation Therapy in the RADAR Trial with Comparison to Multi-Institutional Cohort.** Forest plots for patients in the multi-institutional cohort and RADAR. Since ADT duration was not standardized in the multi-institutional cohort, windows of 16-20 months and 4-8 months were chosen to capture patients receiving similar durations to 18 and 6 months, which were protocol-specified for the RADAR trial. 95% CI; 95% confidence interval; ADT, androgen deprivation therapy; DMFS, distant metastasis-free survival; EBRT, external beam radiotherapy; EBRT+BT, EBRT+brachytherapy boost; HR, hazard ratio.



**eFigure 5. Distant Metastasis-Free Survival and Overall Survival Outcomes for Men Receiving 4-6 or 16-20 months of Androgen Deprivation Therapy in the Multi-Institutional Cohort**

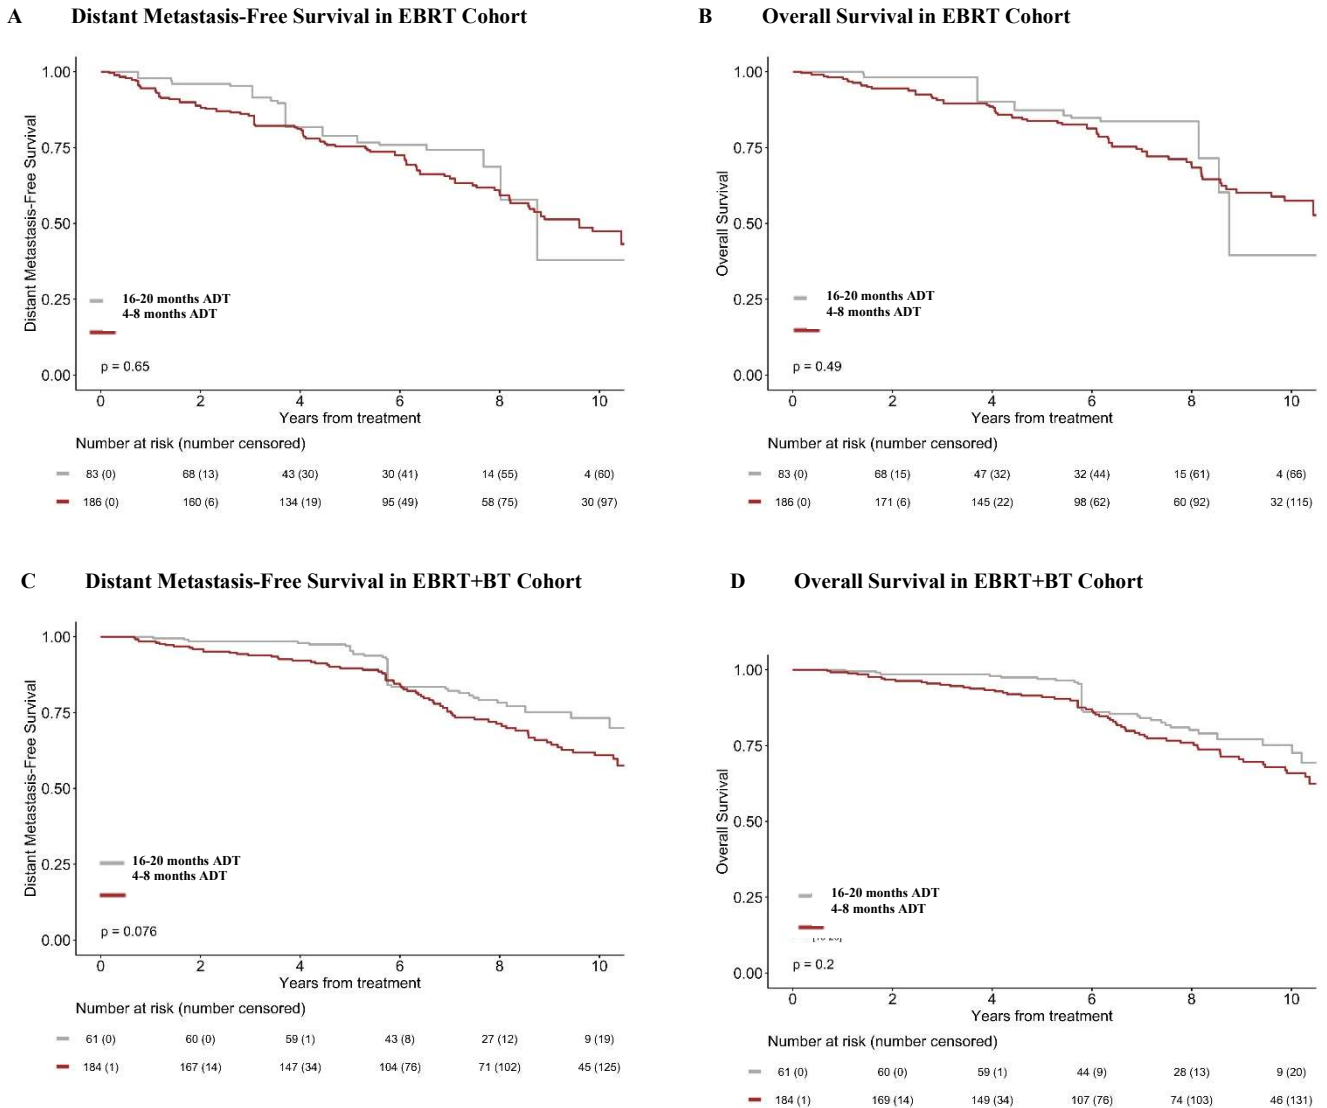

**eFigure 5. Distant Metastasis-Free Survival and Overall Survival Outcomes for Men Receiving 4-6 or 16-20 months of Androgen Deprivation Therapy in the Multi-Institutional Cohort.** Kaplan-Meier curves for distant metastasis-free survival and overall survival for patients receiving external beam radiotherapy or external beam radiotherapy with a brachytherapy boost. Survival curves were adjusted using an inverse probability treatment weighting approach, wherein propensity scores included treatment type, ln(iPSA), clinical T stage, Gleason grade group, and age at treatment as independent covariates. DMFS, distant metastasis-free survival; EBRT, external beam radiotherapy; EBRT+BT, EBRT+brachytherapy boost; OS, overall survival.

**eFigure 6. Associations Between Survival Outcomes and Use of 28 months of Androgen Deprivation Therapy in the GICOR Trial versus 6 months or 18 months of Androgen Deprivation Therapy in the RADAR Trial**

**GICOR (28 months) vs. RADAR (6 or 18 months)**

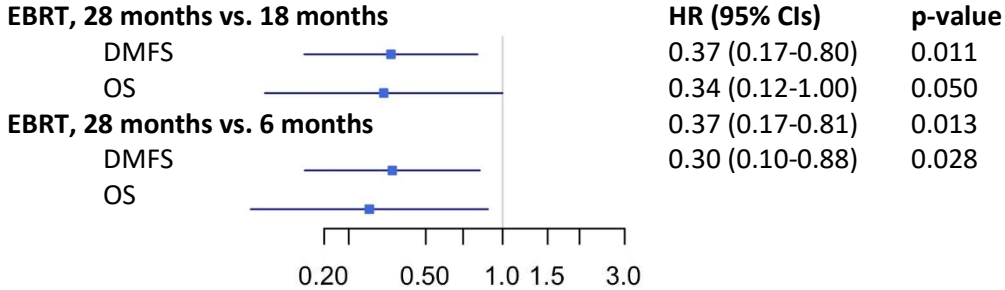

**eFigure 6. Associations Between Survival Outcomes and Use of 28 months of Androgen Deprivation Therapy in the GICOR Trial versus 6 months or 18 months of Androgen Deprivation Therapy in the RADAR Trial.** Forest plots for a cross-trial comparison between the 28 month arm of GICOR and the 6- and 18- month arms of the RADAR trial. 95% CI; 95% confidence interval; ADT, androgen deprivation therapy; DMFS, distant metastasis-free survival; EBRT, external beam radiotherapy; EBRT+BT, EBRT+brachytherapy boost; HR, hazard ratio.
